# Supplementary material for: The ORF8 protein of SARS-CoV-2 mediates immune evasion through down-regulating MHC-Ι
Source: PubMed Central journal article supplement (PMC8201919; doi:10.1073/pnas.2024202118), 2021-05-21
Supplement: pnas.2024202118.sapp.pdf [file pnas.2024202118.sapp.pdf]

## Supplemental Materials

### Supplement Table 1. Sequence of ORF8-scFv-1 and ORF8-scFv-2.

#### ORF8-scFv-1:

ATGGAATCGTGCTGACACAGAGCCCCGGCACACTGTCACTTTCTCCAGGCGAGAC  
AGCCATCATCAGCTGTCAGGCCAGATCATCACCCACTGCTGCTGGTATCAGCAGAG  
GCCTGGACAGGCCCTAGACTGGTCATCTACCCTGAGATCTGGTCCAAGAGAGGCA  
TCCCCGACAGATTCAGCGGCTCTAGATGGGGCCCTGACTACAACCTGACCATCAGC  
AACCTGGAAAGCGGCGACTTCGGCGTGTACTACTGCATGAGCGAGCCCAGATTTGG  
CCAGGGCACAAAGGTGCAGGTCGACATCAAGAGATCTGGCGGCGGAGGATCTTCT  
GGCGGAGGTGGAAGTAGTGGCGGAGGCGGATCTCAGGTTTCAGCTGGTTCAAAGCG  
GCGGACAGATGAAGAAACCCGGCGAGAGCATGCGGATCAGCTGCAGAGCCAGCAG  
ATGCCACATCAGAGTGATGGACCACATCGGCTTCGTGTGGCCTCCAGAGAAGGGAC  
TGTCTGGCTGGGATGGACAGTCTCTCGGCGGATCTAGAGCACCTCCATTTCGACAGC  
ACCCACGTGGAACAGCCCCAGCTGGAAACCTTTATTCCCACACAGCCCTTTTGGAG  
CTGCGCCAGACAGCAGCAGACCACCAGACCTAGCACATTTCGTGCTGGGCACCCTGT  
ACAACACCAAGATGGCCTACTGTGCCAGATGGGCTGGCGCCCCCTAGATCTTCTTCTC  
AC

#### ORF8-scFv-2:

ATGGAATCGTGCTGACACAGAGCCCCGGCACACTGTCACTTTCTCCAGGCGAGAC  
AGCCATCATCAGCTGTCAGGCCAGATCATCACCCACTGCTGCTGGTATCAGCAGAG  
GCCTGGACAGGCCCTAGACTGGTCATCTACCCTGAGATCTGGTCCAAGAGAGGCA  
TCCCCGACAGATTCAGCGGCTCTAGATGGGGCCCTGACTACAACCTGACCATCAGC  
AACCTGGAAAGCGGCGACTTCGGCGTGTACTACTGCATGAGCGAGCCCAGATTTGG  
CCAGGGCACAAAGGTGCAGGTCGACATCAAGAGATCTGGCGGCGGAGGATCTTCT  
GGCGGAGGTGGAAGTAGTGGCGGAGGCGGATCTCAGGTTTCAGCTGGTTCAAAGCG  
GCGGACAGATGAAGAAACCCGGCGAGAGCATGCGGATCAGCTGCAGAGCCTCTAG  
ATGCCAGCACACCAGATACGGCCCCTACTGGATTAGACTGGCCCCTGGCAAAGAC  
CCGAGTGGATGGGATGGCTGAAGCCCAGAGGAATTGCCAGCGCCGCCATCCAGTTT  
CACCCCTGTAGAGTGACCATGACCAGGGACGTGTACAGCGATAACCGCCTTCCTGGA  
ACTGAGAAGCCTGACCGTGGATGATACCGCCGTGTACTTCTGTACCCGGGACCTGAT  
CCAGCACGAGGACGGCATCCTGTGTTCTGTGCGGAGAGGCACACCTGTGATCGTGT  
CTAGT

## Supplementary information

### Antibodies

| Reagent or Resource              | Source                    | Identifier      |
|----------------------------------|---------------------------|-----------------|
| HLA-A2-APC (BB7.2)               | BD Biosciences            | Cat# 561341     |
| HLA-A,B,C-APC (W6/32)            | Biolegend                 | Cat# 311410     |
| HLA-A2-APC (BB7.2)               | Biolegend                 | Cat# 343308     |
| $\beta$ 2-microglobulin-PE (2M2) | Biolegend                 | Cat# 316306     |
| Fixable Viability Dye eFluor 780 | Thermo Scientific         | Cat# 65-0865-14 |
| CD8-BV421 (RPA-T8)               | BD Biosciences            | Cat# 562428     |
| MHC class I Rabbit mAb           | Abclonal                  | Cat# A8754      |
| HLA Class I ABC Antibody         | Proteintech               | Cat# 15240-1-AP |
| HLA Class I Antibody             | Immunoway                 | Cat# YT5837     |
| Calreticulin (D3E6) Rabbit mAb   | Cell Signaling Technology | Cat# 12238T     |
| LAMP1 (D2D11) Rabbit mAb         | Cell Signaling Technology | Cat# 9091T      |
| LC3A/B (D3U4C) Rabbit mAb        | Cell Signaling Technology | Cat# 12741S     |
| GM130 (D6B1) Rabbit mAb          | Cell Signaling Technology | Cat# 12480S     |
| Rab5 (C8B1) Rabbit mAb           | Cell Signaling Technology | Cat# 3547T      |
| HLA A2 antibody                  | Abcam                     | Cat# ab168405   |

### Chemicals, Peptides, and Recombinant Proteins

| Reagent or Resource                                        | Source            | Identifier       |
|------------------------------------------------------------|-------------------|------------------|
| HLA-A cDNA ORF Clone, Human, C- Flag tag                   | sinobiological    | Cat# HG13263-CF  |
| Calreticulin cDNA ORF Clone, Human, C-HA tag               | sinobiological    | Cat# HG13539-CY  |
| RAB5 cDNA ORF Clone                                        | sinobiological    | Cat# HG14013-UT  |
| RAB7A cDNA ORF Clone, C- Flag tag                          | sinobiological    | Cat# HG16168-NF  |
| Beta-2 microglobulin Protein, Human, Recombinant (His Tag) | sinobiological    | Cat# 11976-H08H  |
| Beclin 1 cDNA ORF Clone, Human, C-GFP tag                  | sinobiological    | Cat# HG11162-ACG |
| DSP                                                        | Thermo Scientific | Cat# 22586       |
| Pepstatin                                                  | TargetMol         | Cat# T3695       |
| DBeQ                                                       | TargetMol         | Cat# T1969       |

|                                 |           |              |
|---------------------------------|-----------|--------------|
| MG-132                          | TargetMol | Cat# T2154   |
| Aloxistatin (E64d)              | TargetMol | Cat# T6040   |
| Bafilomycin A1                  | Selleck   | Cat# S1413   |
| Recombinant Human GM-CSF        | Peptotech | Cat# 300-03  |
| Recombinant Human IL-4          | Peptotech | Cat# 200-04  |
| Recombinant Human TNF- $\alpha$ | Peptotech | Cat# 300-01A |
| Recombinant Human IL-2          | Peptotech | Cat# 200-02  |
| Recombinant Human IL-10         | Peptotech | Cat# 200-10  |

### Critical Commercial Assays

| Reagent or Resource                            | Source            | Identifier           |
|------------------------------------------------|-------------------|----------------------|
| Sybr Green PCR Master Mix                      | Thermo Scientific | Cat# 4309155         |
| QuickSwitch Quant HLA-A*02:01 Tetramer Kit-PE  | MBL               | Cat# TB-7300-K1      |
| Human CD8 T Lymphocyte Enrichment Set-DM       | BD Biosciences    | Cat# 557941          |
| Lipofectamin RNAiMAX Transfection Reagent      | Thermo Scientific | Cat# 13778150        |
| Lipofectamin 2000 Transfection Reagent         | Thermo Scientific | Cat# 11668019        |
| Lysosome Isolation Kit                         | Millipore Sigma   | Cat# LYSIS01         |
| ProteoSilver™ Silver Stain Kit                 | Millipore Sigma   | Cat# PROTSIL1        |
| Human IFN- $\gamma$ ELISpot assay kits         | Dakewe            | Cat# DKW22-1000-096s |
| FITC Annexin V Apoptosis Detection Kit with PI | Biologend         | Cat# 640914          |

## Supplement Fig. 1

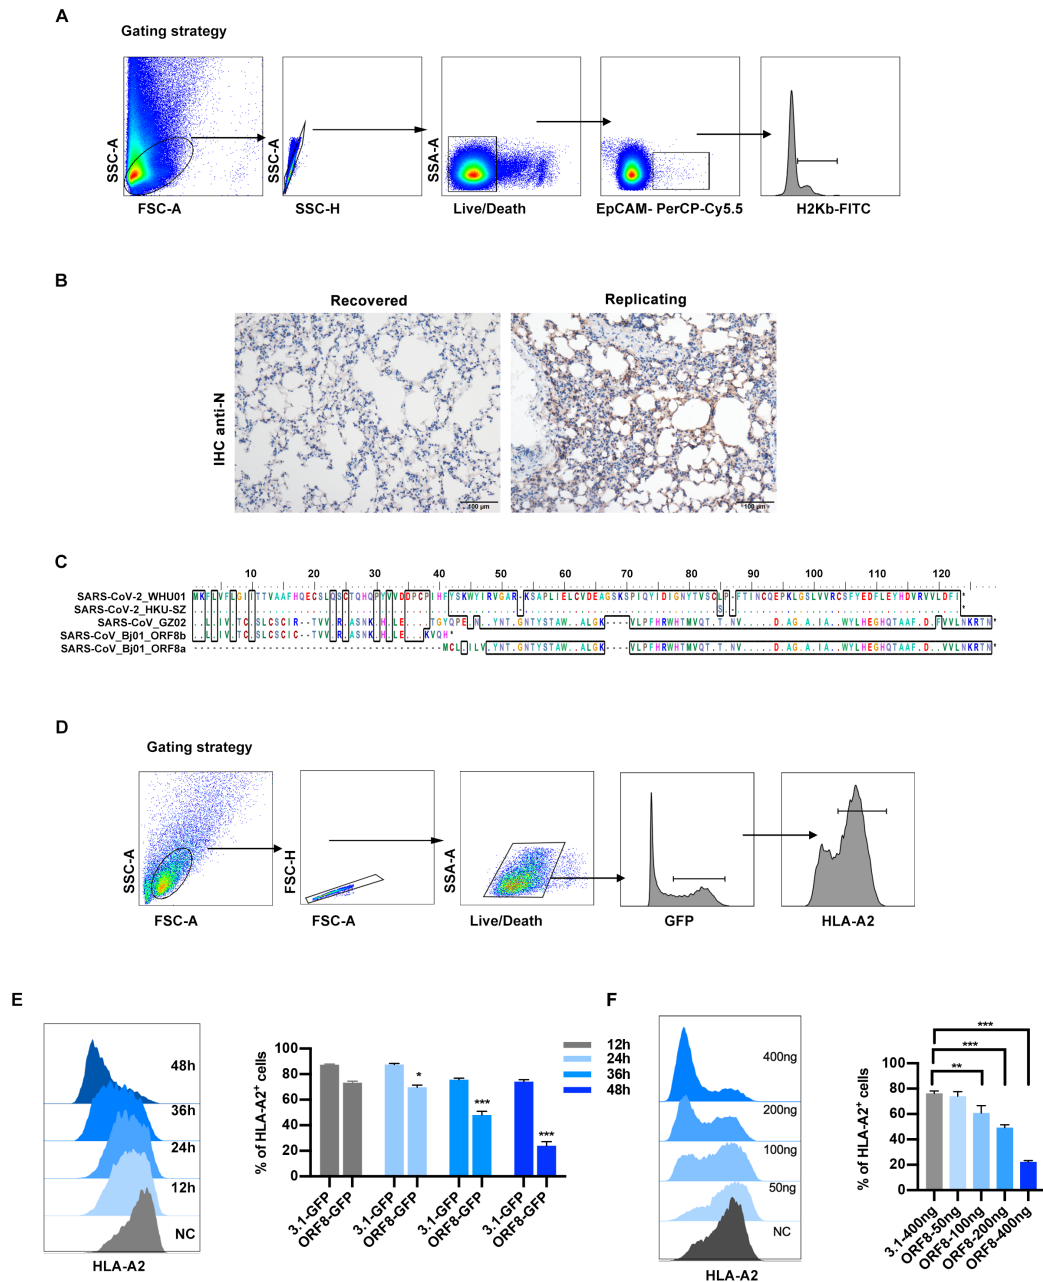

### Supplement Fig. 1 Surface expression of MHC-I is downregulated in ORF8-expressing cells.

(A) Gating strategy for FACS analysis of H2Kb expression on lung epithelial cells of mice. (B) hACE2 mice were intranasal infected with  $4 \times 10^3$  PFU (recovered),  $4 \times 10^4$  PFU (replicating) SARS-CoV-2 virus, or uninfected as control. At day 6 post infection, lung tissues were collected for IHC staining. (C) The multiple alignment was created based on the amino acid sequences of the encoded protein of orf8 gene, including 1 from SARS-CoV-2\_WHU01, 1 from SARS-CoV-2\_HKU-SZ with L84S

mutation, 1 from SARS-CoV\_GZ02, and 1 from SARS-CoV\_BJ01 orf8a, 1 from SARS-CoV\_BJ01 orf8b. The similarity shading with the color was referred to the chemistry of each amino acid at that position. **(D)** Gating strategy for FACS analysis of MHC-I expression on HEK293T cells used in this study. **(E)** GFP, or ORF8-GFP expressing plasmids were transfected into HEK293T cells, respectively. Cells were harvested for flow cytometry analysis at the indicated time points. Frequency of HLA-A2<sup>+</sup> cells (gated on GFP<sup>+</sup> cells) were shown (n=5). **(F)** Different doses of GFP, or ORF8-GFP expressing plasmids were transfected into HEK293T cells, respectively. After 48 hours cells were harvested for flow cytometry. Frequency of HLA-A2<sup>+</sup> cells (gated on GFP<sup>+</sup> cells) were shown (n=5). Data were shown as mean  $\pm$  SD (error bars). t test and one way ANOVA was used. P < 0.05 indicates statistically significance difference. \* indicates P < 0.05; \*\* indicates P < 0.01; \*\*\* indicates P < 0.001.

## Supplement Fig.2

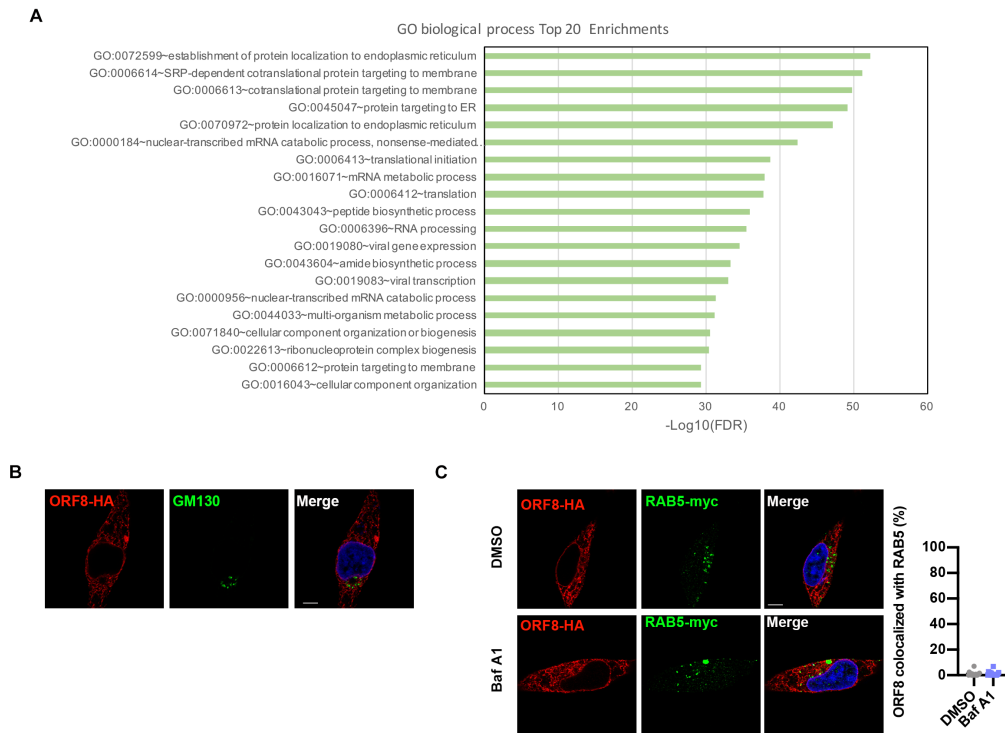

**Supplement Fig.2 ORF8 interacting with endoplasmic reticulum (ER).** (A) The top 20 significant enrichments of the gene ontology (GO) biological process terms. Transformed false discovery rate (FDR) was indicated at the X-axis. (B) Localization of SARS-CoV-2 ORF8 (red) relative to GM130 (green, the top panel). ORF8-HA expressing plasmid was transfected into HEK293T cells. At 24 hours after transfection, co-localization was visualized by confocal microscopy. Scale bars, 5µm. (C) Localization of SARS-CoV-2 ORF8 (red) relative to RAB5 (green). ORF8-HA expressing plasmid together with RAB5-myc expressing plasmid were transfected into HEK293T cells. At 24 hours after transfection, co-localization was visualized by confocal microscopy. Scale bars, 5µm.

### Supplement Fig.3

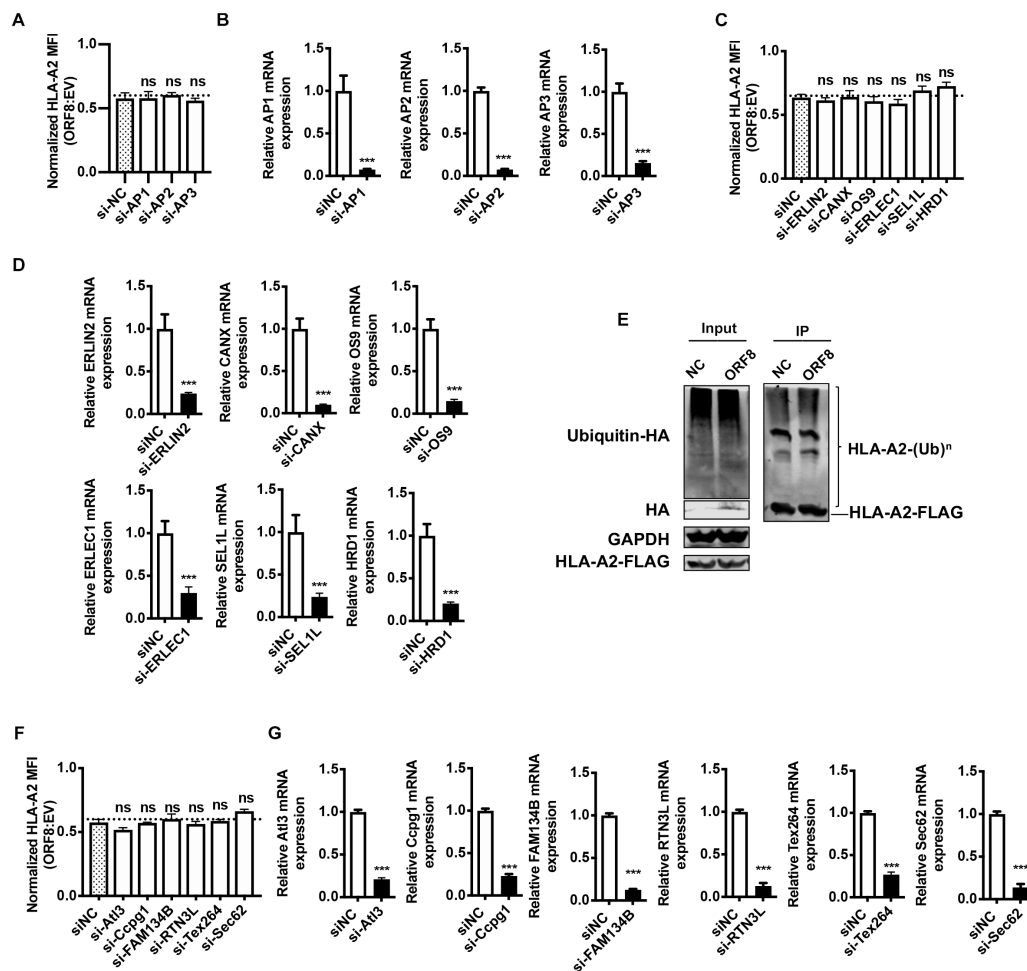

**Supplement Fig.3 ORF8 mediates MHC-I trafficking from ER to lysosome for degradation.** (A) GFP (EV) or ORF8-GFP expressing plasmids, and the indicated siRNAs were transfected into HEK293T cells. MFI of HLA-A2 (gated on GFP<sup>+</sup> cells) was normalized to GFP group (n=5). (B) The knockdown efficiency of indicated siRNAs (n=3). (C) GFP (EV) or ORF8-GFP expressing plasmids, and the indicated siRNAs were transfected into HEK293T cells. MFI of HLA-A2 (gated on GFP<sup>+</sup> cells) was normalized to GFP group (n=5). (D) The knockdown efficiency of indicated siRNAs (n=3). (E) HLA-A2-FLAG and ubiquitin-HA expressing plasmids, in combination with ORF8-HA expressing plasmid or empty vector were transfected into HEK293T cells. Cells were treated with MG132 (10 $\mu$ M) for 12 h before harvest. HLA-A2 ubiquitination was analyzed by Co-IP with anti-Flag-tag beads and followed by western blotting. (F) GFP (EV) or ORF8-GFP expressing plasmid, and the indicated siRNAs were transfected into HEK293T cells. MFI of HLA-A2 (gated on GFP<sup>+</sup> cells) was normalized to 3.1-GFP (n=5). (G) The knockdown efficiency of indicated siRNAs (n=3). Data were shown as mean  $\pm$  SEM (error bars). t test was used. P < 0.05 indicates statistically significance difference. \*\*\* indicates P < 0.001.

## Supplement Fig.4

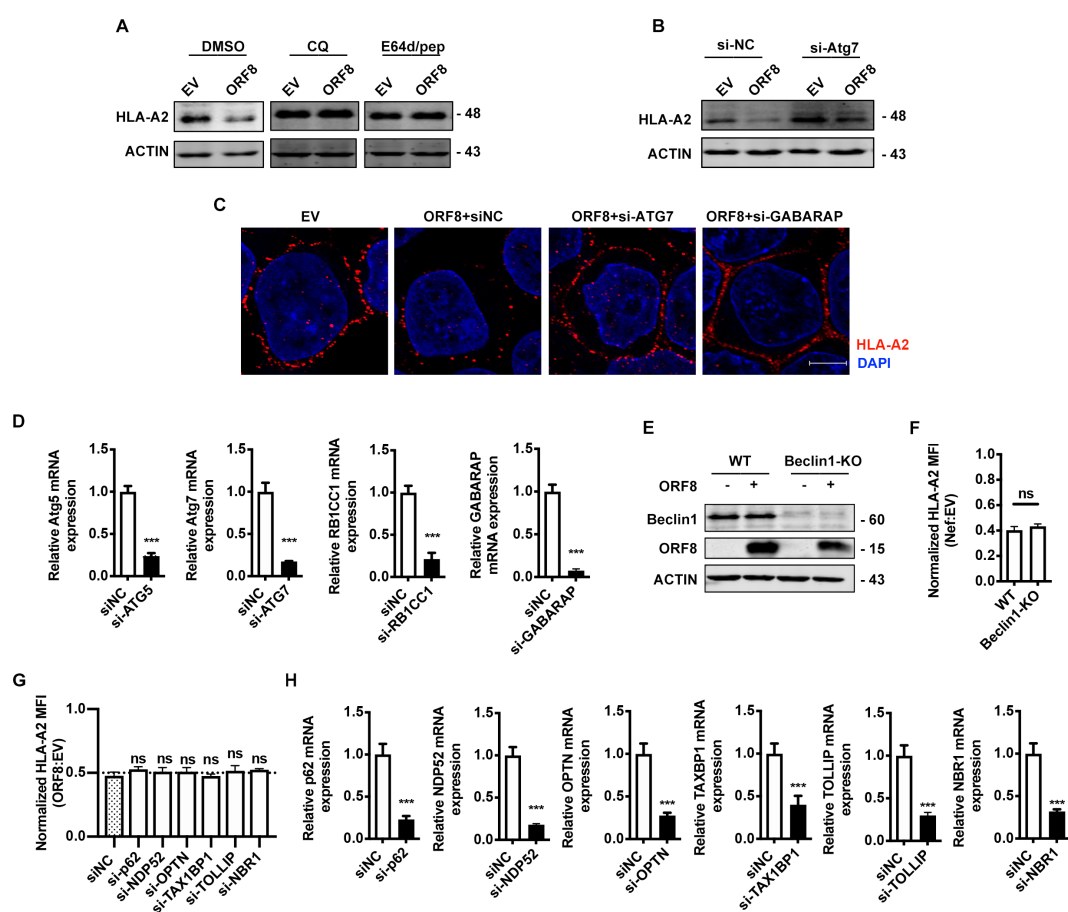

### Supplement Fig.4 ORF8 mediates MHC-I degradation through autophagy pathway.

(A) GFP (EV) or ORF8-GFP expressing plasmid were transfected into HEK293T cells. Before harvest, cells were treated with chloroquine (CQ) (50  $\mu$ M), E64d (10ug/mL), or pepstatin A (pep) (10ug/mL) for 6 hours. The total HLA-A2 protein expression was analyzed by western blotting (n=3). (B) The GFP (EV) or ORF8-GFP expressing plasmids, and the indicated siRNAs were transfected into HEK293T cells. The total HLA-A2 protein expression was analyzed by western blotting (n=3). (C) The ORF8-HA expressing plasmid and the indicated siRNAs were transfected into HEK293T cells. At 48 hours after transfection, HLA-A2 localization was visualized by confocal microscopy. (D) The knockdown efficiency of indicated siRNAs (n=3). (E) GFP (EV) or ORF8-GFP expressing plasmids were transfected into HEK293T cells (WT), or Beclin1 knockout HEK293T cells. At 48 hours after transfection, cells were collected for western blotting (n=3). (F) GFP (EV) or Nef-GFP expressing plasmids were transfected into HEK293T cells (WT), or Beclin1 knockout HEK293T cells. MFI of HLA-A2 (gated on GFP<sup>+</sup> cells) was normalized to GFP group (n=5). (G) The GFP (EV) or ORF8-GFP expressing plasmids, in combination with the indicated siRNAs were transfected into HEK293T cells. MFI of HLA-A2 (gated on GFP<sup>+</sup> cells) was normalized to GFP group (n=5). (H) The knockdown efficiency of indicated siRNAs (n=3). t test was used. \*\*\* indicates P < 0.001.
